# Supplementary material for: Transient loss and recovery of oral chemesthesis, taste and smell with COVID-19: a small case-control series
Source: PubMed Central journal article supplement — medRxiv. 2023 Mar 29:2023.03.27.23287763. Preprint. [Version 1] doi: 10.1101/2023.03.27.23287763 (PMC10081393; doi:10.1101/2023.03.27.23287763), 2023-03-29
Supplement: NIHPP2023.03.27.23287763V1-supplement-1.pdf [file NIHPP2023.03.27.23287763V1-supplement-1.pdf]

578 **Supplemental Materials**

579

580 *Supplemental Figure 1*

581

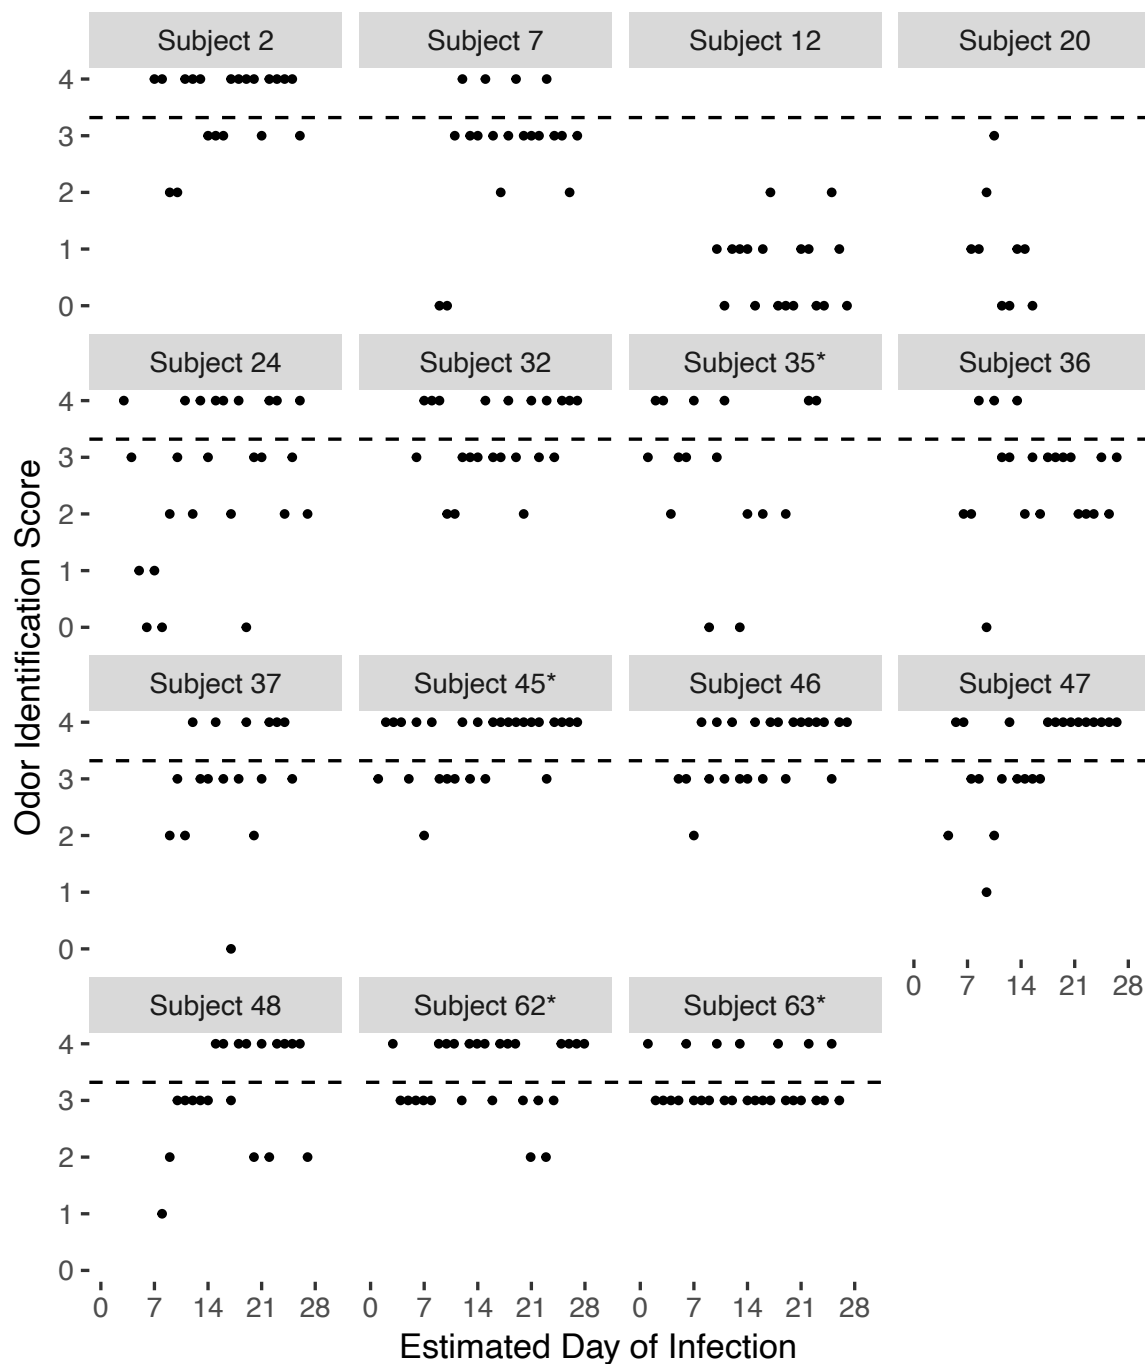

582

583 Raw daily odor identification scores from the ScentCheckPro cards over time for the

584 COVID-19 cases (n=15) who entered the study on or before day 10 of their infection.

585 *Supplemental Figure 2*

586

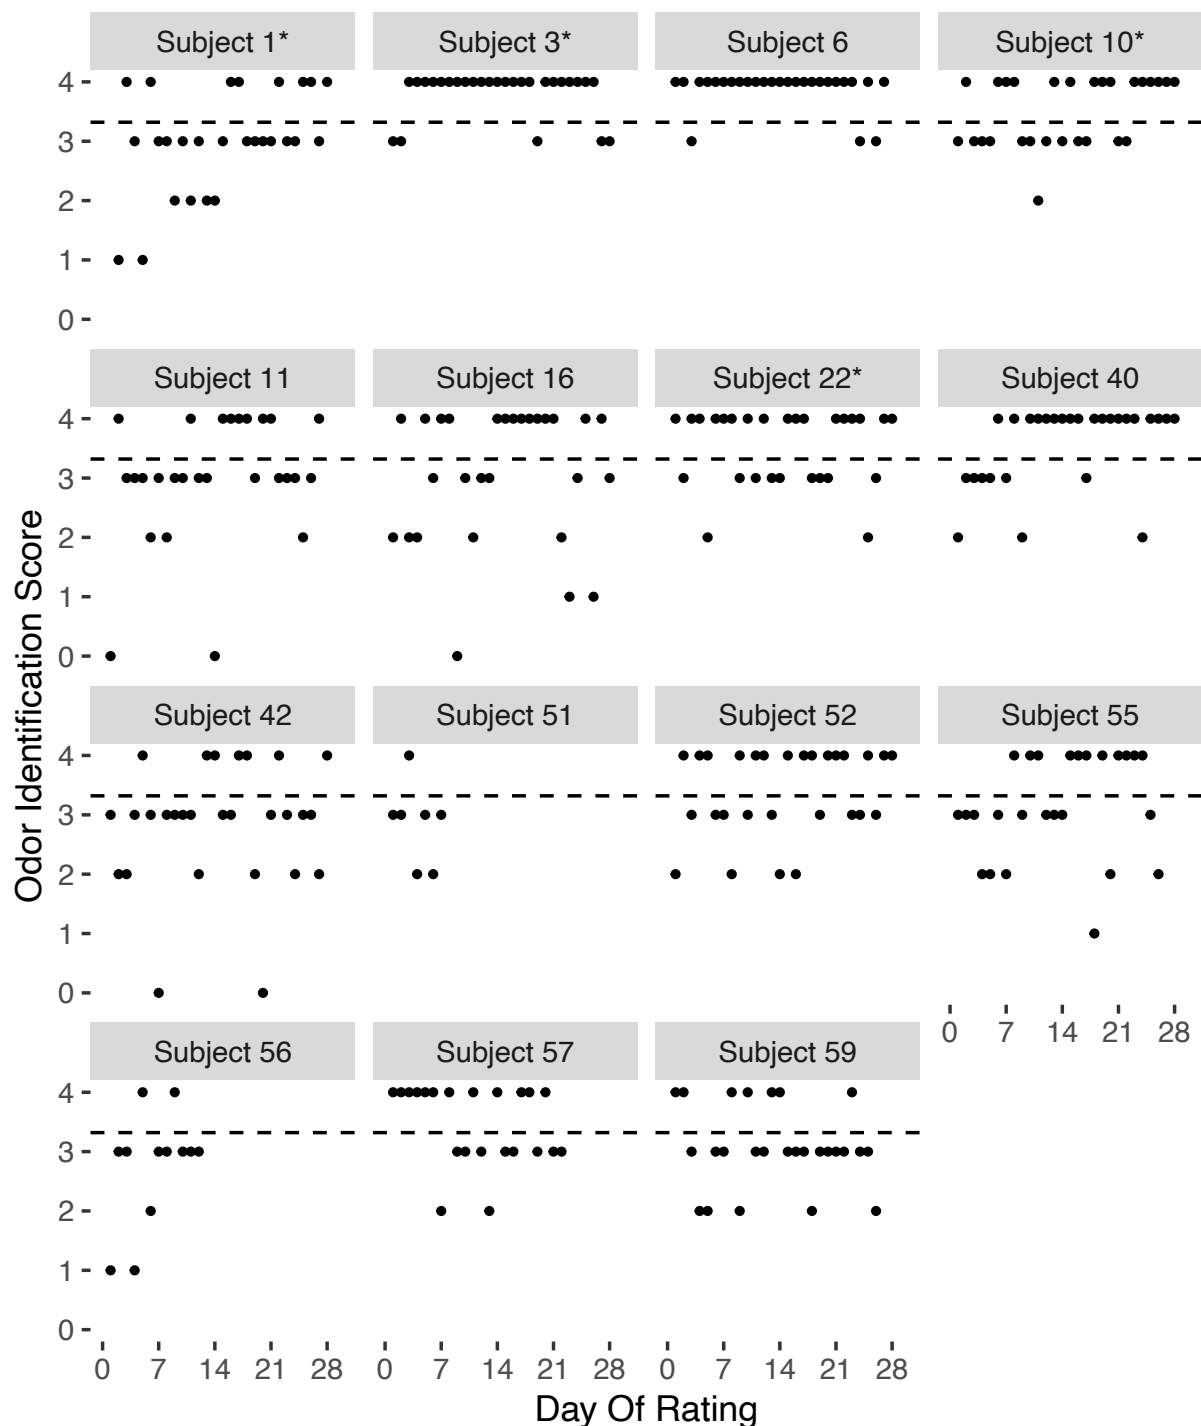

587

588 Raw daily odor identification scores from the ScentCheckPro cards over time for the 15

589 controls.

590

## 591 **Supplemental narrative and discussion of symptoms for the 4 cases**

### 592 ***Subject 35***

593 Subject 35 became a case during the study, enabling visualization of the falling  
594 and rising phases of her responses (see Figure 4). Her symptoms included cough, runny  
595 nose/congestion, sore throat, and headache. Regarding orthonasal scratch-n-sniff  
596 intensity ratings, daily means decreased through day 15 before recovering. OdorID  
597 scores showed a similar pattern, but data were noisier given the learning effect  
598 described above. Together, this suggests her orthonasal olfaction was transiently  
599 affected during active COVID-19 infection, as expected (e.g., [19, 71, 72]). Notably, she  
600 showed impaired smell even after nasal blockage resolved around Day 8, and her  
601 maximal smell loss and maximal nasal blockage were dyssynchronous. This is consistent  
602 with other reports showing COVID-19 smell loss is not associated with nasal blockage  
603 [4-7, 10], presumably because COVID-19-associated loss arises from ACE2 receptor-  
604 mediated disruption of the olfactory epithelium, and not the conductive losses seen with  
605 the common cold.

606 Her sourness ratings from the Sour Cherry jellybean declined until ~Day 15,  
607 when ratings began to increase, while sweetness declined until ~Day 6, before beginning  
608 to recover. The decline and subsequent rise of sweet and sour taste likely signifies  
609 normal recovery, although Figure 4 also shows dyssynchronous recovery of these tastes  
610 (i.e., sweetness did not recover as swiftly as sourness). These data indicate sweet and  
611 sour taste are each transiently affected with an active COVID-19 infection, and this was  
612 *not* merely a taste/flavor semantic confusion, as ratings were obtained while wearing  
613 nose clips. Subject 35 also showed large changes in burn from the Cinnamon jellybeans,  
614 suggesting oral chemesthesis is affected by COVID-19. The lack of burn from the Sour  
615 Cherry jellybeans serves as a negative control, indicating she was successful in  
616 discriminating between burn from a Cinnamon jellybean and a lack of burn from a Sour  
617 Cherry jellybean (a pattern also seen in the three other cases shown in Figure 4). These  
618 data indicate perception of oral burn can be affected by an active COVID-19 infection  
619 dyssynchronously from taste or smell. While patient anecdotes (including social media  
620 posts) have previously suggested nasal and/or oral chemesthesis may be affected by  
621 SARS-CoV-2 infection [39, 49, 73], the daily assessment and prospective design used  
622 here provide quantitative evidence of altered oral chemesthesis with COVID-19.

623 **Subject 45**

624 Subject 45 converted from being a close contact to an active COVID-19 case  
625 during the study, but unlike Subject 35, Subject 45 never reported any symptoms during  
626 her infection. Yet, despite being nominally asymptomatic, she still showed a clear drop  
627 in both OdorID performance and ratings of orthonasal intensity around Day 5 (with a  
628 bigger effect size for intensity). This highlights that some individuals infected with  
629 SARS-CoV-2 may be unaware of the impact on their sensory abilities, consistent with  
630 recent meta-analysis by Hannum and colleagues [8, 48]. Nor was this transient  
631 disruption in smell due to nasal blockage (as reported elsewhere [4-7, 10]). As her  
632 infection progressed, sourness from the Sour Cherry jellybean was variable, and  
633 sweetness from this jellybean steadily declined over the course of infection, again  
634 indicative of temporal dyssynchrony for different taste qualities. In contrast to burn  
635 rating from the Sour Cherry jellybean (which stayed near 0 across the study period, as  
636 expected), burn from the Cinnamon jellybean steadily increased in a monotonic fashion  
637 until a small drop was observed at the end of the study. Taken together with data from  
638 Subject 35, this indicates suggests oral chemesthesis is altered by active SARS-CoV-2  
639 infection. Another study noted that during recovery from COVID-19, some patients  
640 report an increase in the ability to feel sensations in the mouth, including burning [49].

641 **Subject 62**

642 Subject 62's infection began 1 day before enrollment. Like Subject 45, he failed to  
643 self-report any symptoms, but unlike Subjects 35 and 45, his orthonasal intensity  
644 ratings and OdorID performance remained relatively constant throughout the study  
645 period, and his nasal blockage was generally low – while many individuals experience  
646 smell loss with COVID-19, some do not (e.g., [8, 48]). Regarding taste, noisy data make  
647 it hard to draw any strong conclusions, but it still seems he may have experienced  
648 substantial changes in sour and sweet taste. Regarding burn, he rated the burn from  
649 Sour Cherry jellybeans near zero for the entire study, suggesting he successfully  
650 distinguished burn from the Cinnamon jellybean from the lack of burn from the Sour  
651 Cherry jellybean (like the other cases). Two other values merit comment: in the 1<sup>st</sup> and  
652 3<sup>rd</sup> week of testing, a sharp drop in sour taste intensity and sharp increase in burn  
653 intensity can be seen on two separate days; we suspect he may have misread the  
654 blinding codes, tasting the wrong sample on these days, as Sour Cherry jellybeans

655 should be sour without any burn. Still, despite noise in his ratings, his panel plots for  
656 burn suggest he experienced transient changes in oral chemesthesis. If this case did in  
657 fact experience altered burn and altered taste without concomitant smell loss, this  
658 would emphasize that mechanisms of loss across all three modalities are distinct, with  
659 the caveat that the noise in these data should temper any strong inferences.

### 660 ***Subject 63***

661 Subject 63 enrolled 2 weeks days before becoming a case. Because this greatly  
662 exceeds the expected incubation period of 5 to 7 days [37, 50], our study team contacted  
663 her via email. At that point, she reported a second exposure to an individual with  
664 COVID-19 – we assume this second exposure was the source of the infection  
665 documented here. Her data reveals changes in smell, taste, and chemesthesis as she  
666 transitioned from being a close contact to being a case, but the observation period only  
667 captures her initial illness without any recovery as she had enrolled after her first  
668 exposure that did not cause an infection. Consistent with this interpretation, she did not  
669 report any symptoms for the first 2 weeks, but then began reporting many symptoms  
670 (sore throat, fever or chills, dry cough, body aches, fatigue, diarrhea, nausea or  
671 vomiting, headache, and dry cough). Notably, her mean orthonasal ratings began to  
672 decline somewhat a few days before the estimated day of infection, but she indicated  
673 little to no nasal blockage, as expected [4-7, 10]. Also, her intensity ratings suggest she  
674 experienced hyposmia, rather than full anosmia, so it is unsurprising that her OdorID  
675 performance remained relatively constant across the study period, with some evidence  
676 of a slight learning effect near the beginning of the study. As discussed previously, this  
677 suggests rated smell intensity might provide more nuanced assessment of smell function  
678 versus odor identification. We have no obvious explanation for her unexpectedly low  
679 sourness ratings on the first two days of the study. Still, if her peak ratings during this  
680 initial (uninfected) period are tentatively treated as a baseline, we see a subsequent  
681 decline in sourness around the time her other symptoms appeared. For the rest of the  
682 study, her sour ratings remained relatively depressed, at least relative to the maximal  
683 values she reported pre-infection. In contrast, sweetness, while noisy, appeared more  
684 constant across the entire study. Tentatively, these plots suggest Subject 63 lost some  
685 taste function in a quality specific manner, as well as partial smell loss and loss of oral  
686 chemesthesis, with staggered timing of each, during her infection.
